# Supplementary material
Source: PubMed Central journal article supplement (PMC2739001)

**SUPPLEMENTAL FIGURES LEGENDS**

**Supplementary Figure S1.** The L1CAM<sup>+</sup> glioma cell subpopulation correlates with the CD133<sup>+</sup> glioma cell population. *A*, FACS analysis indicated that the fraction of CD133<sup>+</sup> cells was similar to that of L1CAM<sup>+</sup> cells in primary glioblastomas T3837 and T3852. Unsorted tumor cells from primary glioma samples were labeled with anti-CD133-APC, or anti-L1CAM-PE, and then subjected to FACS analysis for CD133<sup>+</sup> population or L1CAM<sup>+</sup> population. The fractions of CD133<sup>+</sup> cells and L1CAM<sup>+</sup> cells in total unsorted tumor cells were very similar in each case. *B*, FACS analyses of the L1CAM<sup>+</sup> cell fraction in CD133<sup>+</sup> and CD133<sup>-</sup> subpopulations isolated from the glioblastoma surgical specimens T3691, T3832, and T3946 are displayed. Sorted CD133<sup>+</sup> and CD133<sup>-</sup> populations were cultured short term and then labeled as in (*B*). 78-93% of CD133<sup>+</sup> cells also expressed L1CAM, whereas CD133<sup>-</sup> glioma cells rarely expressed L1CAM (\*,  $p < 0.001$ ).

**Supplementary Figure S2.** Knockdown of L1CAM in CD133<sup>+</sup> glioma cells reduces self-renewal due to increased apoptosis. *A*, Targeting L1CAM expression disrupted neurosphere formation of CD133<sup>+</sup> brain tumor cells derived from a T3691 glioblastoma patient specimen or a D456MG pediatric glioblastoma xenograft. CD133<sup>+</sup> cells infected with lentivirus expressing non-targeting shRNA (NT) formed neurospheres, whereas infection with lentivirus expressing L1CAM shRNA attenuated neurosphere formation. *B*, Knockdown of L1CAM expression via lentiviral shRNA significantly reduced neurosphere formation of CD133<sup>+</sup> brain tumor cells isolated from the primary

glioblastomas T3852 and T3946. \*,  $p < 0.001$ . C, FACS analysis of apoptosis with Annexin V-FITC staining confirmed that L1CAM knockdown induces apoptotic cell death of CD133+ brain tumor cells from both the glioblastoma surgical specimen T3691 and the pediatric glioblastoma xenograft D456MG. \*,  $p < 0.001$  with comparison to non-targeting shRNA.

**Supplementary Figure S3.** Knockdown of L1CAM expression preferentially suppresses the growth of CD133+ glioblastoma cells. Identical numbers of CD133+ brain tumor cells ( $3 \times 10^5$ ) (A), matched CD133- cells (B), and CD133+ normal neural progenitor cells (C) were infected with lentivirus expressing non-targeting control shRNA (NT) or L1CAM shRNA. CD133+ and CD133- cells were isolated from a glioblastoma T4105 patient specimen. Live cells were quantified on days 3, 5 and 7 after infection using trypan blue staining. All cells were cultured under identical conditions in neurobasal media with B27 and EGF/FGF growth factors (20 ng/ml for each). \*,  $p < 0.01$ , \*\*  $p < 0.001$  with comparison to non-targeting control cells on the same day.

**Supplementary Figure S4.** Knockdown of L1CAM decreases tumor formation by targeting CD133+ glioma cells. A, Representative images of brains of mice injected with CD133+ cells isolated from the anaplastic astrocytoma T3565 patient specimen and infected with lentivirus expressing non-targeting shRNA (NT) or L1CAM shRNA are displayed. Identical numbers of viable cells ( $10^5$  cells/mouse) 48 hours after infection were implanted and brains examined on day 17 after injection. B, Knockdown of L1CAM in CD133+ cells isolated from the anaplastic astrocytomas patient specimen

T3565 prior to intracranial implantation increased survival.  $p < 0.001$  with comparison to non-targeting control. CD133+ cells isolated from brain tumor patient specimens and infected with non-targeting shRNA (NT) or L1CAM shRNA prior to injection were implanted into the brains of immunocompromised mice as in (A). C, Targeting L1CAM in CD133+ cells isolated from the glioblastoma patient specimen T4105 decreased their tumorigenic potential *in vivo*. Decreasing numbers of CD133+ cells ( $10^6$  to 100) infected with non-targeting shRNA (NT) or L1CAM shRNA were implanted into the brains of immunocompromised mice with five mice per condition and animals were permitted to survive until the development of neurologic signs. The incidence of tumor formation and the average number of days of survival is indicated. D, Targeting L1CAM in CD133+ cells isolated from the anaplastic astrocytoma patient specimen T3565 decreases their tumorigenic potential *in vivo*. Decreasing numbers of CD133+ cells ( $10^6$  to 500) infected with non-targeting shRNA (NT) or L1CAM shRNA were implanted into the brains of immunocompromised mice with five mice per condition and animals were permitted to survive until the development of neurologic signs. The incidence of tumor formation and the average number of days of survival is indicated.

**Supplementary Figure S5.** A, Representative images of subcutaneous tumors treated with lentivirus expressing non-targeting shRNA (NT) or L1CAM directed shRNA are shown. Identical numbers of CD133+ glioma cells ( $10^5$  cells/mouse) isolated from the glioblastoma T3832 patient specimen were implanted into nude mice to establish small subcutaneous tumors. After tumor establishment, lentivirus expressing non-targeting control shRNA (NT) or L1CAM shRNA was delivered to the subcutaneous tumors

through direct injection to the tumor site for 21 days (once every other day). *B*, Growth of established subcutaneous tumors was reduced by treatment with lentivirus expressing L1CAM shRNA in comparison to non-targeting shRNA (NT) as demonstrated by significantly reduced average tumor weight (\*,  $p < 0.01$ ). *C*, Western blot confirms that injection of lentivirus expressing L1CAM shRNA (L1) to the tumor site reduces the expression of L1CAM protein in glioma xenografts compared to treatment with lentivirus expressing non-targeting shRNA (NT). *D*, FACS analysis further confirmed that the CD133+ glioma cell population was reduced in tumors treated with L1CAM shRNA targeting lentivirus relative to that treated with non-targeting control lentivirus.

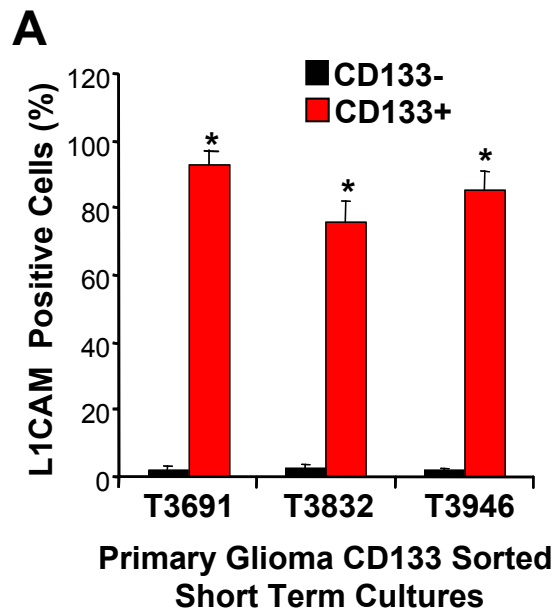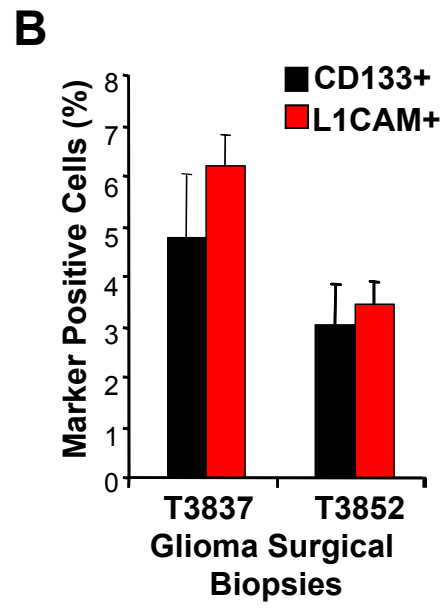

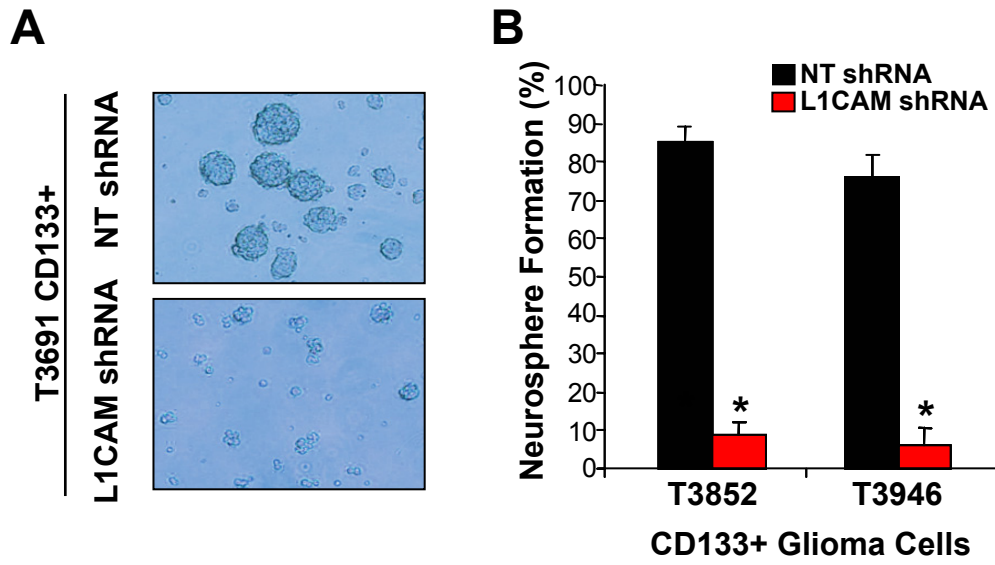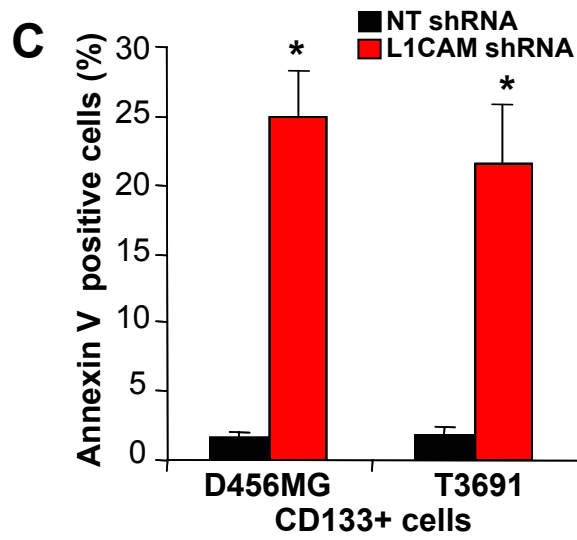

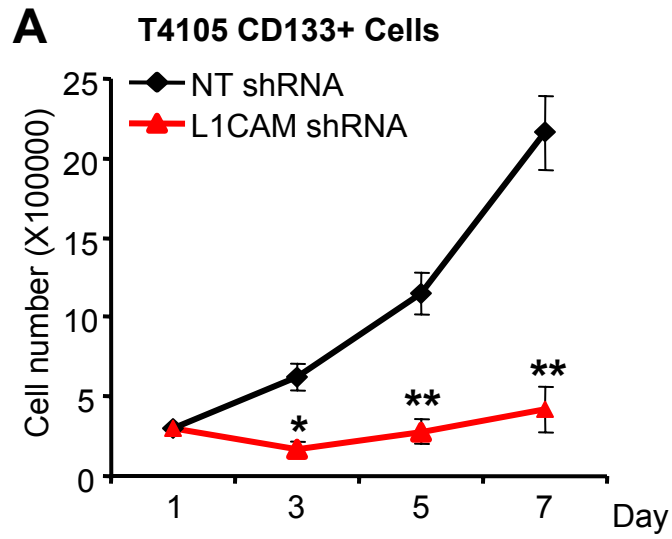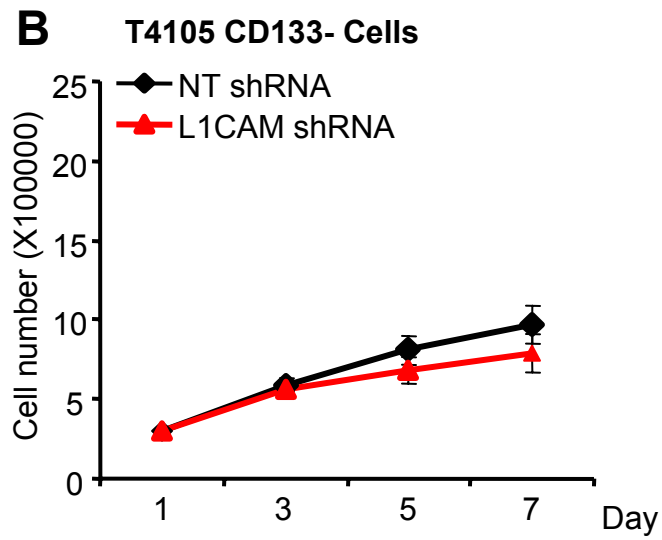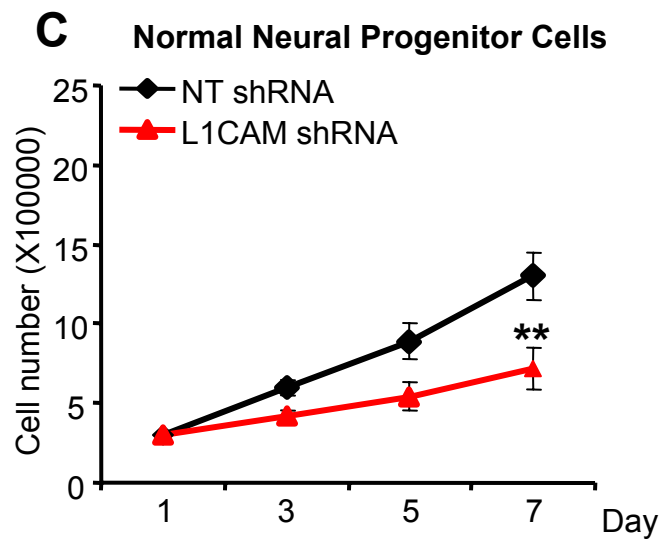

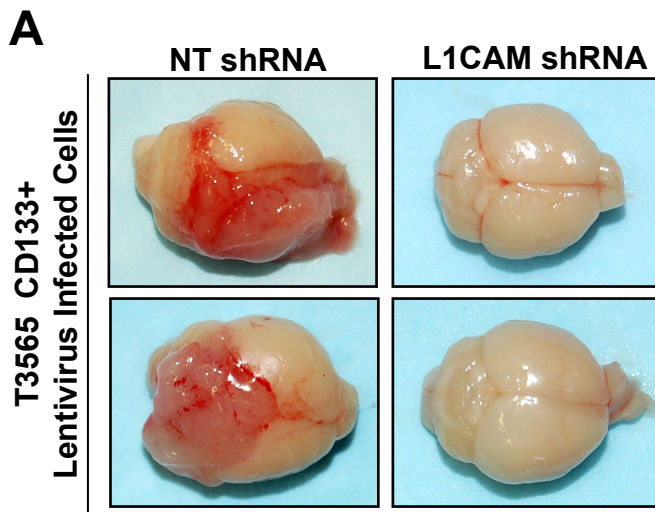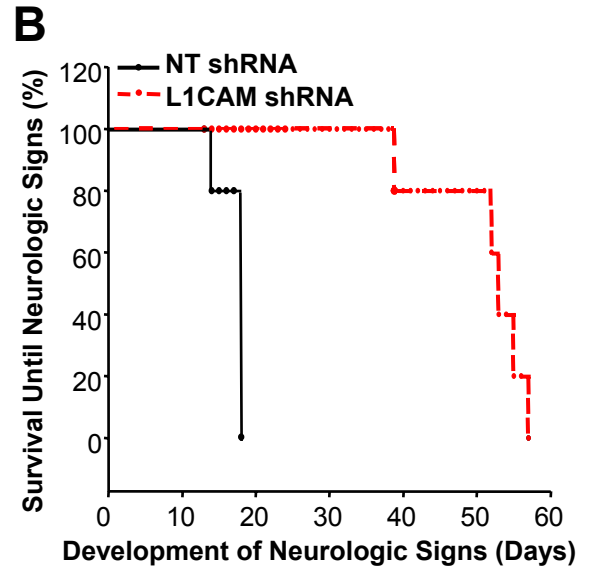

**C**

| shRNA         | T4105 CD133+ Lentivirus Infected Cells |         |        |       |      |
|---------------|----------------------------------------|---------|--------|-------|------|
|               | Cell Number                            | 1000000 | 100000 | 10000 | 1000 |
| Non-Targeting | Incidence                              | 5/5     | 5/5    | 5/5   | 5/5  |
|               | Median Survival                        | 18      | 35     | 46    | 72   |
| L1CAM         | Incidence                              | 5/5     | 5/5    | 4/5   | 0/5  |
|               | Median Survival                        | 31      | 52     | 71    | --   |

**D**

| shRNA         | T3565 CD133+ Lentivirus Infected Cells |         |        |       |      |     |
|---------------|----------------------------------------|---------|--------|-------|------|-----|
|               | Cell Number                            | 1000000 | 100000 | 10000 | 1000 | 500 |
| Non-Targeting | Incidence                              | 5/5     | 5/5    | 5/5   | 5/5  | 4/5 |
|               | Median Survival                        | 18      | 32     | 55    | 69   | 88  |
| L1CAM         | Incidence                              | 5/5     | 5/5    | 0/5   | 0/5  | 0/5 |
|               | Median Survival                        | 33      | 64     | -     | -    | -   |



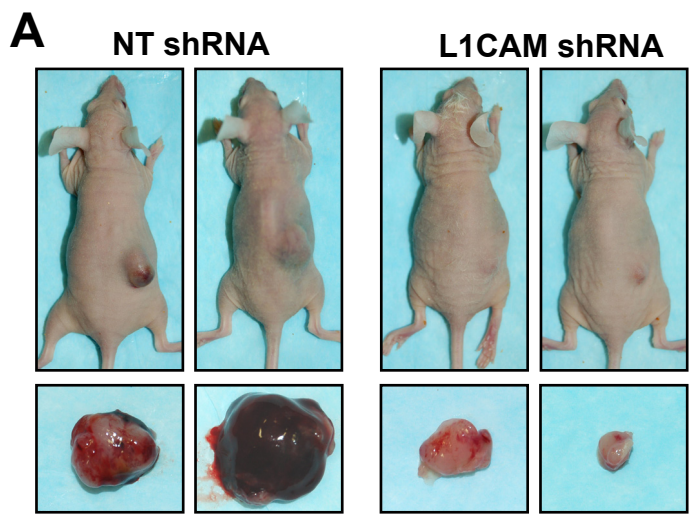

**T3832 CD133+ Derived Tumors Treated with Lentiviral shRNA**

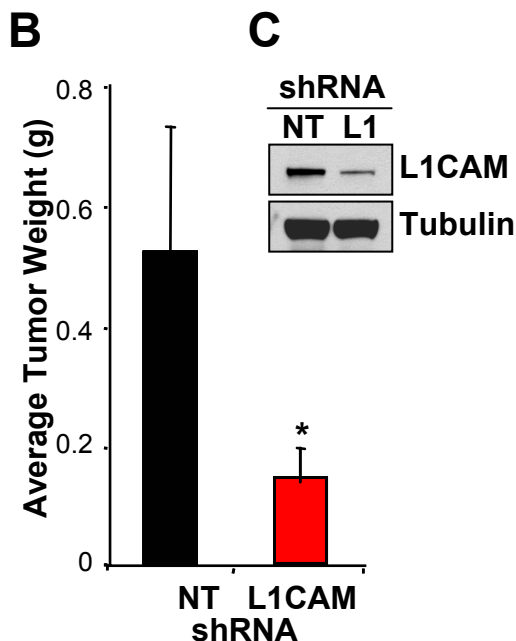

**D** **T4184 CD133+ Derived Tumors Treated with Lentiviral shRNA**

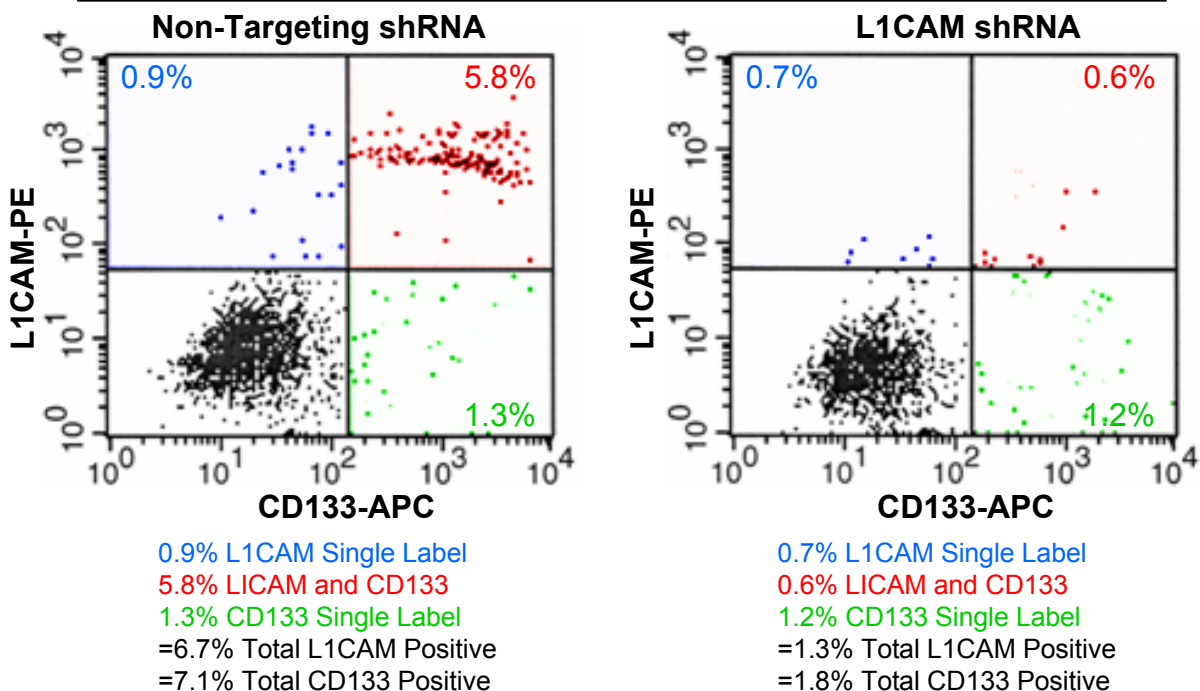

Supplement: NIHMS123195-supplement-1.pdf [file NIHMS123195-supplement-1.pdf]
